# Supplementary material
Source: HighWire-hosted journal article supplement (https://bmjopen.bmj.com/content/12/8/e063640)
Supplement: inline-supplementary-material-1 [file inline-supplementary-material-1.pdf]

**Table S1.** Included main diagnoses divided by categories when COVID-19 is secondary diagnosis.

| Included categories                                                       | ICD-codes |
|---------------------------------------------------------------------------|-----------|
| <b>COVID-related symptoms</b>                                             |           |
| Cough                                                                     | R05       |
| Abnormalities of breathing                                                | R06       |
| Pain in throat and chest                                                  | R07       |
| Other symptoms and signs involving the circulatory and respiratory system | R09       |
| Dizziness and giddiness                                                   | R42       |
| Fever of other or unknown origin                                          | R50       |
| Headache                                                                  | R51       |
| Malaise and fatigue                                                       | R53       |
| Syncope and collapse                                                      | R55       |
| <b>Upper and lower respiratory tract infections</b>                       |           |
| Acute nasopharyngitis                                                     | J00       |
| Acute tonsillitis                                                         | J03       |
| Acute upper respiratory infections of multiple and unspecified sites      | J06       |
| Influenza due to other identified influenza virus                         | J10       |
| Other viral pneumonia                                                     | J128      |
| Viral pneumonia, unspecified                                              | J129      |
| Pneumonia due to <i>Streptococcus pneumoniae</i>                          | J13       |
| Bacterial pneumonia, not elsewhere classified                             | J15       |
| Pneumonia due to other specified infectious organisms                     | J168      |
| Pneumonia in diseases classified elsewhere                                | J17       |
| Pneumonia, unspecified organism                                           | J18       |
| Unspecified acute lower respiratory infection                             | J22       |
| Coronavirus infection, unspecified                                        | B342      |
| Other viral infections of unspecified site                                | B348      |
| Viral infection, unspecified                                              | B349      |
| Coronavirus as the cause of diseases classified elsewhere                 | B972      |
| Other and unspecified infectious diseases                                 | B99       |
| <b>Respiratory disorders</b>                                              |           |
| Pulmonary embolism                                                        | I26       |
| Acute respiratory distress syndrome                                       | J80       |
| Pulmonary edema                                                           | J81       |
| Pleural effusion not elsewhere classified                                 | J90       |
| Respiratory failure, not elsewhere classified                             | J96       |
| Respiratory disorders in diseases classified elsewhere                    | J99       |
| <b>Obstructive Airway Diseases</b>                                        |           |
| Acute bronchitis due to other specified organisms                         | J208      |
| Acute bronchitis, unspecified                                             | J209      |
| Acute bronchiolitis due to other specified organisms                      | J218      |
| Acute bronchiolitis, unspecified                                          | J219      |
| Other chronic obstructive pulmonary disease                               | J44       |
| Asthma                                                                    | J45       |
| <b>Cardiac diseases</b>                                                   |           |
| Viral carditis                                                            | B332      |
| Chronic ischemic heart disease                                            | I25       |
| Acute pericarditis                                                        | I30       |
| Pericarditis in diseases classified elsewhere                             | I32       |
| Acute myocarditis, unspecified                                            | I40       |
| Myocarditis in diseases classified elsewhere                              | I41       |
| Atrial fibrillation and flutter                                           | I48       |
| Heart failure                                                             | I50       |
| Abnormalities of heart beat                                               | R00       |

|                                                             |     |
|-------------------------------------------------------------|-----|
| <b>Kidney disorders</b>                                     |     |
| Acute kidney failure                                        | N17 |
| Chronic kidney disease                                      | N18 |
| Unspecified kidney failure                                  | N19 |
| <b>Electrolyte disorders</b>                                |     |
| Other disorders of fluid, electrolyte and acid-base balance | E87 |

**Table S2:** Result of hospitalization analysis. OR, 95% CI. Basic model includes adjusting for age in 2020 and children of other ages. Reference for each age bracket is children in other brackets or no children at all.

| <i>Age of child in 2020</i>                             | <i>Basic model</i>      | <i>Adjusted for baseline CRF</i> | <i>Adjusted for baseline BMI, height, morbidity</i> | <i>Adjusted for parental education, income, region</i> | <i>Adjusted for profession</i> | <i>Full model</i>       |
|---------------------------------------------------------|-------------------------|----------------------------------|-----------------------------------------------------|--------------------------------------------------------|--------------------------------|-------------------------|
| <b>All hospitalizations March 2020 – September 2021</b> |                         |                                  |                                                     |                                                        |                                |                         |
| <i>N</i>                                                | 1 557 061               | 1 142 222                        | 1 557 061                                           | 1 420 206                                              | 1 557 061                      | 1 027 123               |
| <i>n of cases</i>                                       | 8 655                   | 6 731                            | 8 655                                               | 7 497                                                  | 8 655                          | 5 765                   |
| 2-5                                                     | <b>0.74</b> (0.66-0.83) | <b>0.72</b> (0.62-0.84)          | <b>0.76</b> (0.68-0.85)                             | <b>0.78</b> (0.70-0.88)                                | <b>0.75</b> (0.66-0.84)        | <b>0.78</b> (0.66-0.90) |
| 6-8                                                     | 0.95 (0.86-1.05)        | 1.02 (0.89-1.16)                 | 0.96 (0.87-1.06)                                    | 0.99 (0.90-1.10)                                       | 0.95 (0.86-1.05)               | 1.01 (0.95-1.13)        |
| 9-12                                                    | 0.98 (0.90-1.06)        | 0.94 (0.84-1.02)                 | 0.99 (0.92-1.08)                                    | 1.03 (0.95-1.11)                                       | 0.98 (0.91-1.06)               | 0.99 (0.89-1.10)        |
| 13-17                                                   | <b>1.16</b> (1.09-1.24) | <b>1.16</b> (1.07-1.25)          | <b>1.18</b> (1.10-1.26)                             | <b>1.21</b> (1.13-1.29)                                | <b>1.16</b> (1.08-1.23)        | <b>1.19</b> (1.10-1.29) |
| 18-19                                                   | <b>1.16</b> (1.07-1.25) | <b>1.16</b> (1.06-1.27)          | <b>1.17</b> (1.08-1.27)                             | <b>1.18</b> (1.09-1.29)                                | <b>1.16</b> (1.07-1.26)        | <b>1.20</b> (1.09-1.32) |
| 20-22                                                   | 1.09 (0.99-1.18)        | 1.10 (0.99-1.20)                 | <b>1.10</b> (1.01-1.19)                             | <b>1.14</b> (1.05-1.25)                                | 1.08 (0.99-1.17)               | <b>1.15</b> (1.04-1.27) |
| 22 and over                                             | <b>1.15</b> (1.08-1.21) | <b>1.17</b> (1.09-1.24)          | <b>1.15</b> (1.08-1.21)                             | <b>1.20</b> (1.12-1.28)                                | <b>1.14</b> (1.08-1.21)        | <b>1.20</b> (1.13-1.30) |
| <b>Wave 1 (March-September 2020)</b>                    |                         |                                  |                                                     |                                                        |                                |                         |
| <i>n of cases</i>                                       | 2 430                   | 1 884                            | 2 430                                               | 2 096                                                  | 2 430                          | 1 612                   |
| 2-5                                                     | <b>0.71</b> (0.57-0.89) | <b>0.60</b> (0.44-0.82)          | <b>0.73</b> (0.58-0.91)                             | <b>0.75</b> (0.60-0.94)                                | <b>0.72</b> (0.57-0.89)        | <b>0.64</b> (0.46-0.88) |
| 6-8                                                     | 0.86 (0.70-1.05)        | 0.86 (0.66-1.12)                 | 0.87 (0.72-1.06)                                    | 0.91 (0.74-1.12)                                       | 0.87 (0.71-1.06)               | 0.91 (0.70-1.19)        |
| 9-11                                                    | 0.91 (0.78-1.07)        | 0.91 (0.75-1.10)                 | 0.93 (0.79-1.08)                                    | 0.99 (0.84-1.16)                                       | 0.91 (0.78-1.07)               | 1.00 (0.82-1.22)        |
| 12-17                                                   | 0.94 (0.83-1.07)        | 0.90 (0.78-1.05)                 | 0.96 (0.84-1.09)                                    | 1.00 (0.87-1.14)                                       | 0.94 (0.83-1.07)               | 0.94 (0.80-1.10)        |
| 18-19                                                   | 1.16 (0.99-1.35)        | <b>1.23</b> (1.04-1.46)          | 1.17 (1.00-1.37)                                    | <b>1.18</b> (1.00-1.41)                                | 1.15 (0.99-1.35)               | <b>1.26</b> (1.05-1.51) |
| 20-22                                                   | 1.16 (0.99-1.35)        | <b>1.22</b> (1.03-1.45)          | 1.17 (1.00-1.37)                                    | <b>1.24</b> (1.05-1.46)                                | 1.15 (0.99-1.34)               | <b>1.30</b> (1.09-1.55) |
| 22 and over                                             | <b>1.24</b> (1.11-1.38) | <b>1.24</b> (1.10-1.40)          | <b>1.24</b> (1.12-1.38)                             | <b>1.33</b> (1.18-1.51)                                | <b>1.24</b> (1.11-1.38)        | <b>1.32</b> (1.15-1.51) |
| <b>Wave 2 (September 2020-February 2021)</b>            |                         |                                  |                                                     |                                                        |                                |                         |
| <i>n of cases</i>                                       | 2 575                   | 2 041                            | 2 575                                               | 2 182                                                  | 2 575                          | 1 707                   |
| 2-5                                                     | <b>0.80</b> (0.64-0.99) | 0.94 (0.72-1.24)                 | 0.82 (0.66-1.03)                                    | 0.86 (0.68-1.08)                                       | 0.80 (0.64-1.00)               | 1.06 (0.80-1.41)        |
| 6-8                                                     | 0.93 (0.76-1.12)        | 1.04 (0.81-1.33)                 | 0.94 (0.77-1.15)                                    | 0.99 (0.80-1.21)                                       | 0.93 (0.76-1.13)               | 1.15 (0.90-1.48)        |
| 9-11                                                    | 0.99 (0.85-1.16)        | 0.90 (0.75-1.11)                 | 1.00 (0.86-1.17)                                    | 1.04 (0.88-1.22)                                       | 0.99 (0.85-1.16)               | 0.96 (0.78-1.17)        |
| 12-17                                                   | 1.11 (0.97-1.26)        | 1.15 (0.99-1.32)                 | 1.14 (1.00-1.29)                                    | <b>1.17</b> (1.02-1.33)                                | 1.12 (0.99-1.26)               | <b>1.22</b> (1.04-1.41) |
| 18-19                                                   | <b>1.20</b> (1.03-1.40) | 1.16 (0.98-1.38)                 | <b>1.21</b> (1.04-1.41)                             | <b>1.28</b> (1.09-1.50)                                | <b>1.20</b> (1.03-1.40)        | <b>1.28</b> (1.07-1.52) |
| 20-22                                                   | 1.01 (0.86-1.18)        | 1.02 (0.85-1.21)                 | 1.02 (0.87-1.20)                                    | 1.08 (0.91-1.28)                                       | 1.01 (0.86-1.18)               | 1.11 (0.92-1.35)        |

|                                         |                         |                         |                         |                         |                         |                         |
|-----------------------------------------|-------------------------|-------------------------|-------------------------|-------------------------|-------------------------|-------------------------|
| 22 and over                             | 1.17 (1.05-1.31)        | 1.19 (1.07-1.35)        | 1.17 (1.05-1.30)        | 1.27 (1.12-1.42)        | 1.16 (1.05-1.29)        | 1.31 (1.15-1.50)        |
| <b>Wave 3 (February 2021-July 2021)</b> |                         |                         |                         |                         |                         |                         |
| <i>n of cases</i>                       | 3 650                   | 2 806                   | 3 650                   | 3 219                   | 3 650                   | 2 446                   |
| 2-5                                     | <b>0.73</b> (0.62-0.87) | <b>0.69</b> (0.55-0.86) | <b>0.75</b> (0.64-0.89) | <b>0.76</b> (0.64-0.90) | <b>0.73</b> (0.62-0.87) | <b>0.73</b> (0.58-0.91) |
| 6-8                                     | 1.01 (0.88-1.17)        | 1.10 (0.92-1.31)        | 1.03 (0.90-1.19)        | 1.05 (0.90-1.21)        | 1.01 (0.88-1.17)        | 1.14 (0.95-1.37)        |
| 9-11                                    | 1.02 (0.91-1.14)        | 0.97 (0.84-1.11)        | 1.04 (0.93-1.16)        | 1.04 (0.92-1.17)        | 1.02 (0.91-1.14)        | 0.99 (0.86-1.14)        |
| 12-17                                   | <b>1.33</b> (1.21-1.46) | <b>1.34</b> (1.20-1.50) | <b>1.35</b> (1.23-1.48) | <b>1.36</b> (1.23-1.50) | <b>1.33</b> (1.21-1.46) | <b>1.35</b> (1.21-1.52) |
| 18-19                                   | <b>1.14</b> (1.01-1.28) | 1.11 (0.97-1.27)        | <b>1.15</b> (1.02-1.30) | 1.13 (1.00-1.29)        | <b>1.14</b> (1.01-1.29) | 1.12 (0.97-1.30)        |
| 20-22                                   | 1.08 (0.96-1.23)        | 1.06 (0.92-1.20)        | 1.10 (0.97-1.24)        | 1.13 (0.99-1.29)        | 1.08 (0.96-1.23)        | 1.08 (0.93-1.26)        |
| 22 and over                             | 1.07 (0.97-1.17)        | 1.09 (0.98-1.21)        | 1.07 (0.97-1.17)        | 1.07 (0.96-1.18)        | 1.07 (0.99-1.16)        | 1.07 (0.95-1.20)        |

**Table S3:** Associations between children in the household and hospitalization due to COVID-19. Model controlled for age, baseline BMI, CRF, height, chronic morbidity, parental education, income, profession and place of residence in 2018. OR, 95% CI.

|                             | <b>Only children 2-5</b> | <b>Only children 6-12</b> | <b>Only children 13-22</b> | <b>Only Children 6-22</b> |
|-----------------------------|--------------------------|---------------------------|----------------------------|---------------------------|
| <i>N</i>                    | 66 385                   | 119 397                   | 382 277                    | 698 938                   |
| <i>n of cases</i>           | 120                      | 426                       | 2 504                      | 3 690                     |
| <i>March 2020-July 2021</i> | <b>0.54</b> (0.42-0.71)  | 0.95 (0.84-1.08)          | <b>1.28</b> (1.21-1.36)    | <b>1.30</b> (1.22-1.39)   |
| <i>Wave 1</i>               | <b>0.49</b> (0.29-0.82)  | <b>0.74</b> (0.57-0.98)   | <b>1.30</b> (1.16-1.46)    | <b>1.22</b> (1.08-1.38)   |
| <i>Wave 2</i>               | 0.60 (0.36-1.00)         | 0.78 (0.59-1.02)          | <b>1.34</b> (1.20-1.50)    | <b>1.37</b> (1.21-1.54)   |
| <i>Wave 3</i>               | <b>0.57</b> (0.40-0.82)  | 1.18 (0.99-1.40)          | <b>1.24</b> (1.13-1.36)    | <b>1.31</b> (1.19-1.44)   |

**Table S4:** Result of infection analysis. OR, 95% CI. Basic model includes adjusting for age in 2020 and children of other ages. Reference for each age bracket is children in other brackets or no children at all.

| Age of child in 2020      | Basic model             | Adjusted for baseline CRF | Adjusted for baseline BMI, height, morbidity | Adjusted for parental education, income | Adjusted for profession | Full model              |
|---------------------------|-------------------------|---------------------------|----------------------------------------------|-----------------------------------------|-------------------------|-------------------------|
| <b>All test positives</b> |                         |                           |                                              |                                         |                         |                         |
| <i>N</i>                  | 1 557 061               | 1 142 222                 | 1 557 061                                    | 1 420 206                               | 1 557 061               | 1 027 123               |
| <i>n of cases</i>         | 189 446                 | 135 503                   | 189 446                                      | 179 211                                 | 189 446                 | 126 946                 |
| 2-5                       | <b>1.04</b> (1.02-1.06) | <b>0.98</b> (0.96-0.99)   | <b>1.04</b> (1.02-1.05)                      | <b>0.95</b> (0.94-0.97)                 | <b>1.04</b> (1.02-1.06) | <b>0.91</b> (0.89-0.93) |
| 6-8                       | <b>1.13</b> (1.11-1.15) | <b>1.01</b> (1.07-1.12)   | <b>1.12</b> (1.11-1.14)                      | <b>1.06</b> (1.04-1.07)                 | <b>1.13</b> (1.11-1.15) | <b>1.04</b> (1.01-1.06) |
| 9-11                      | <b>1.26</b> (1.24-1.27) | <b>1.22</b> (1.20-1.24)   | <b>1.25</b> (1.23-1.27)                      | <b>1.17</b> (1.15-1.18)                 | <b>1.25</b> (1.24-1.27) | <b>1.14</b> (1.12-1.16) |
| 12-17                     | <b>1.43</b> (1.41-1.45) | <b>1.41</b> (1.39-1.43)   | <b>1.42</b> (1.41-1.44)                      | <b>1.31</b> (1.29-1.33)                 | <b>1.43</b> (1.41-1.45) | <b>1.29</b> (1.27-1.32) |
| 18-19                     | <b>1.34</b> (1.32-1.36) | <b>1.33</b> (1.30-1.35)   | <b>1.33</b> (1.31-1.36)                      | <b>1.25</b> (1.23-1.27)                 | <b>1.34</b> (1.32-1.36) | <b>1.24</b> (1.22-1.27) |
| 20-22                     | <b>1.30</b> (1.28-1.33) | <b>1.29</b> (1.26-1.31)   | <b>1.29</b> (1.27-1.32)                      | <b>1.20</b> (1.18-1.22)                 | <b>1.30</b> (1.28-1.33) | <b>1.19</b> (1.16-1.21) |
| 22 and over               | <b>1.16</b> (1.15-1.18) | <b>1.20</b> (1.18-1.22)   | <b>1.16</b> (1.14-1.18)                      | <b>1.02</b> (1.00-1.03)                 | <b>1.16</b> (1.14-1.18) | <b>1.06</b> (1.04-1.08) |
| <b>Wave 1</b>             |                         |                           |                                              |                                         |                         |                         |
| <i>n of cases</i>         | 10 937                  | 8 034                     | 10 937                                       | 10 110                                  | 10 937                  | 7 355                   |
| 2-5                       | 0.95 (0.88-1.02)        | 0.92 (0.84-1.02)          | 0.95 (0.88-1.02)                             | <b>0.90</b> (0.83-0.97)                 | 0.95 (0.88-1.02)        | <b>0.89</b> (0.80-0.98) |
| 6-8                       | 0.96 (0.90-1.03)        | 0.97 (0.89-1.06)          | 0.96 (0.89-1.03)                             | <b>0.92</b> (0.85-0.98)                 | 0.96 (0.90-1.03)        | 0.94 (0.85-1.02)        |
| 9-11                      | 1.01 (0.95-1.07)        | 1.01 (0.94-1.08)          | 1.01 (0.95-1.07)                             | 0.96 (0.90-1.02)                        | 1.01 (0.95-1.07)        | 0.96 (0.89-1.04)        |
| 12-17                     | <b>1.20</b> (1.14-1.26) | <b>1.17</b> (1.10-1.24)   | <b>1.19</b> (1.13-1.26)                      | <b>1.13</b> (1.07-1.19)                 | <b>1.19</b> (1.13-1.25) | <b>1.10</b> (1.04-1.17) |
| 18-19                     | <b>1.34</b> (1.26-1.43) | <b>1.38</b> (1.28-1.48)   | <b>1.34</b> (1.26-1.43)                      | <b>1.26</b> (1.18-1.35)                 | <b>1.34</b> (1.25-1.43) | <b>1.30</b> (1.21-1.40) |
| 20-22                     | <b>1.30</b> (1.21-1.39) | <b>1.31</b> (1.22-1.42)   | <b>1.29</b> (1.20-1.38)                      | <b>1.23</b> (1.15-1.32)                 | <b>1.29</b> (1.20-1.38) | <b>1.23</b> (1.14-1.34) |
| 22 and over               | <b>1.17</b> (1.10-1.23) | <b>1.22</b> (1.15-1.30)   | <b>1.16</b> (1.10-1.23)                      | <b>1.08</b> (1.02-1.15)                 | <b>1.16</b> (1.10-1.23) | <b>1.13</b> (1.05-1.21) |
| <b>Wave 2</b>             |                         |                           |                                              |                                         |                         |                         |
| <i>n of cases</i>         | 81 923                  | 59 038                    | 81 923                                       | 77 276                                  | 81 923                  | 55 142                  |
| 2-5                       | 1.01 (0.99-1.04)        | <b>0.96</b> (0.93-0.98)   | 1.01 (0.98-1.03)                             | <b>0.92</b> (0.90-0.95)                 | 1.01 (0.99-1.04)        | <b>0.88</b> (0.85-0.91) |
| 6-8                       | <b>1.06</b> (1.03-1.08) | 1.02 (0.99-1.05)          | <b>1.05</b> (1.03-1.08)                      | 0.99 (0.97-1.01)                        | <b>1.06</b> (1.03-1.08) | <b>0.96</b> (0.93-0.99) |
| 9-11                      | <b>1.20</b> (1.17-1.22) | <b>1.15</b> (1.12-1.18)   | <b>1.20</b> (1.17-1.22)                      | <b>1.11</b> (1.09-1.14)                 | <b>1.20</b> (1.17-1.22) | <b>1.08</b> (1.05-1.11) |
| 12-17                     | <b>1.37</b> (1.35-1.40) | <b>1.35</b> (1.32-1.37)   | <b>1.36</b> (1.34-1.39)                      | <b>1.25</b> (1.23-1.28)                 | <b>1.37</b> (1.34-1.39) | <b>1.24</b> (1.21-1.26) |
| 18-19                     | <b>1.28</b> (1.25-1.31) | <b>1.26</b> (1.22-1.30)   | <b>1.27</b> (1.24-1.30)                      | <b>1.20</b> (1.17-1.23)                 | <b>1.27</b> (1.25-1.31) | <b>1.18</b> (1.15-1.22) |

|                   |                         |                         |                         |                         |                         |                         |
|-------------------|-------------------------|-------------------------|-------------------------|-------------------------|-------------------------|-------------------------|
| 20-22             | <b>1.27</b> (1.24-1.31) | <b>1.26</b> (1.22-1.30) | <b>1.26</b> (1.23-1.29) | <b>1.17</b> (1.14-1.20) | <b>1.27</b> (1.24-1.30) | <b>1.16</b> (1.13-1.20) |
| 22 and over       | <b>1.17</b> (1.15-1.20) | <b>1.21</b> (1.18-1.24) | <b>1.17</b> (1.14-1.19) | <b>1.03</b> (1.01-1.05) | <b>1.17</b> (1.15-1.20) | <b>1.06</b> (1.03-1.09) |
| <b>Wave 3</b>     |                         |                         |                         |                         |                         |                         |
| <i>n of cases</i> | 96 586                  | 68 431                  | 96 586                  | 91 825                  | 96 586                  | 64 449                  |
| 2-5               | <b>1.06</b> (1.04-1.08) | 1.00 (0.97-1.03)        | <b>1.06</b> (1.03-1.08) | 0.99 (0.97-1.01)        | <b>1.06</b> (1.04-1.08) | <b>0.94</b> (0.91-0.97) |
| 6-8               | <b>1.18</b> (1.16-1.21) | <b>1.16</b> (1.12-1.18) | <b>1.18</b> (1.15-1.20) | <b>1.12</b> (1.09-1.14) | <b>1.18</b> (1.16-1.21) | <b>1.10</b> (1.07-1.13) |
| 9-11              | <b>1.28</b> (1.26-1.31) | <b>1.25</b> (1.23-1.28) | <b>1.28</b> (1.26-1.31) | <b>1.20</b> (1.18-1.22) | <b>1.28</b> (1.26-1.30) | <b>1.18</b> (1.16-1.21) |
| 12-17             | <b>1.42</b> (1.40-1.45) | <b>1.41</b> (1.38-1.44) | <b>1.42</b> (1.40-1.44) | <b>1.32</b> (1.30-1.34) | <b>1.42</b> (1.40-1.45) | <b>1.31</b> (1.28-1.34) |
| 18-19             | <b>1.33</b> (1.30-1.36) | <b>1.31</b> (1.28-1.35) | <b>1.32</b> (1.29-1.35) | <b>1.24</b> (1.22-1.27) | <b>1.33</b> (1.30-1.36) | <b>1.24</b> (1.21-1.27) |
| 20-22             | <b>1.28</b> (1.25-1.31) | <b>1.25</b> (1.22-1.29) | <b>1.27</b> (1.24-1.30) | <b>1.18</b> (1.15-1.21) | <b>1.28</b> (1.25-1.31) | <b>1.17</b> (1.13-1.20) |
| 22 and over       | <b>1.13</b> (1.10-1.15) | <b>1.17</b> (1.14-1.19) | <b>1.12</b> (1.10-1.15) | 0.99 (0.98-1.02)        | <b>1.13</b> (1.10-1.15) | <b>1.04</b> (1.01-1.06) |
